# Supplementary material for: Effects of MrwetA on Sexual Reproduction and Secondary Metabolism of Monascus ruber M7 Based on Transcriptome Analysis
Source: MDPI journal article supplement (doi:10.3390/jof10050338), 2024-05-08

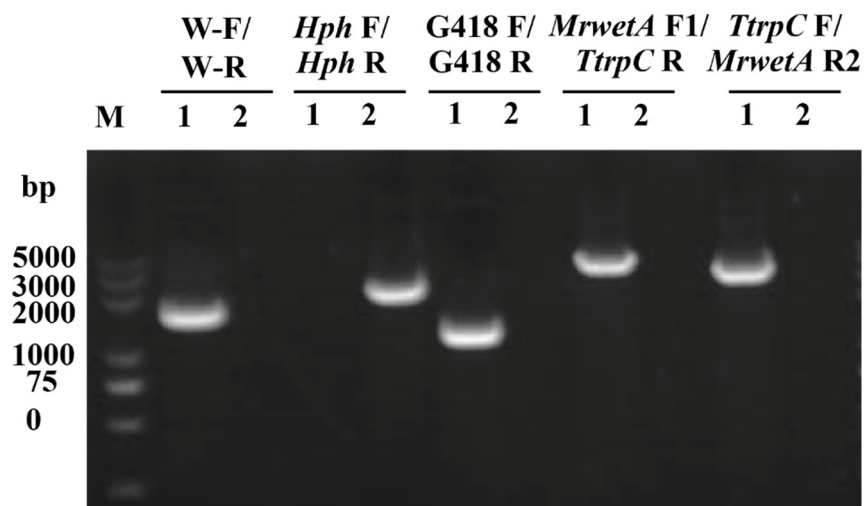

**Figure S3.** PCR verification of *MrwetA* complementation strain. M: marker; Lane 1 and 2: The genomes of the  $\Delta MrwetA::MrwetA$  and  $\Delta MrwetA$  strains were used as templates.

The original images are as follows:

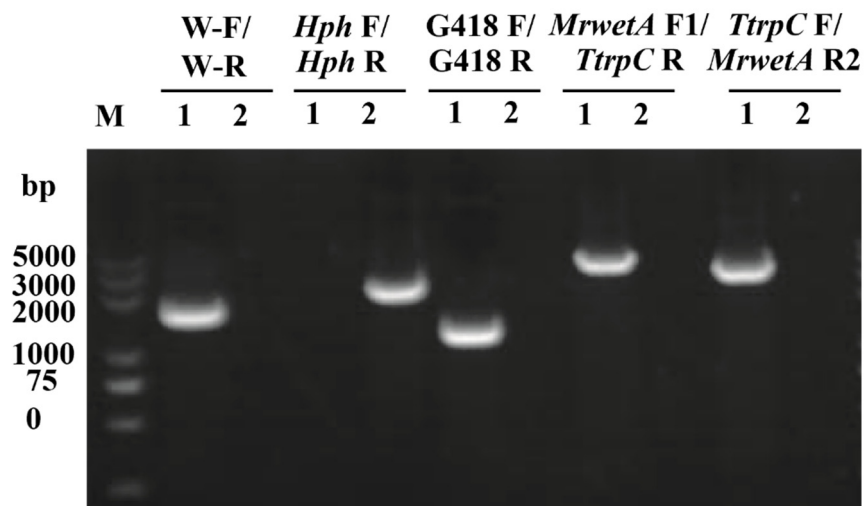

Supplement: s1 [file s1]
