# Supplementary material for: Effects of MrwetA on Sexual Reproduction and Secondary Metabolism of Monascus ruber M7 Based on Transcriptome Analysis
Source: MDPI journal article supplement (doi:10.3390/jof10050338), 2024-05-08
Supplement: s1 [file s1]

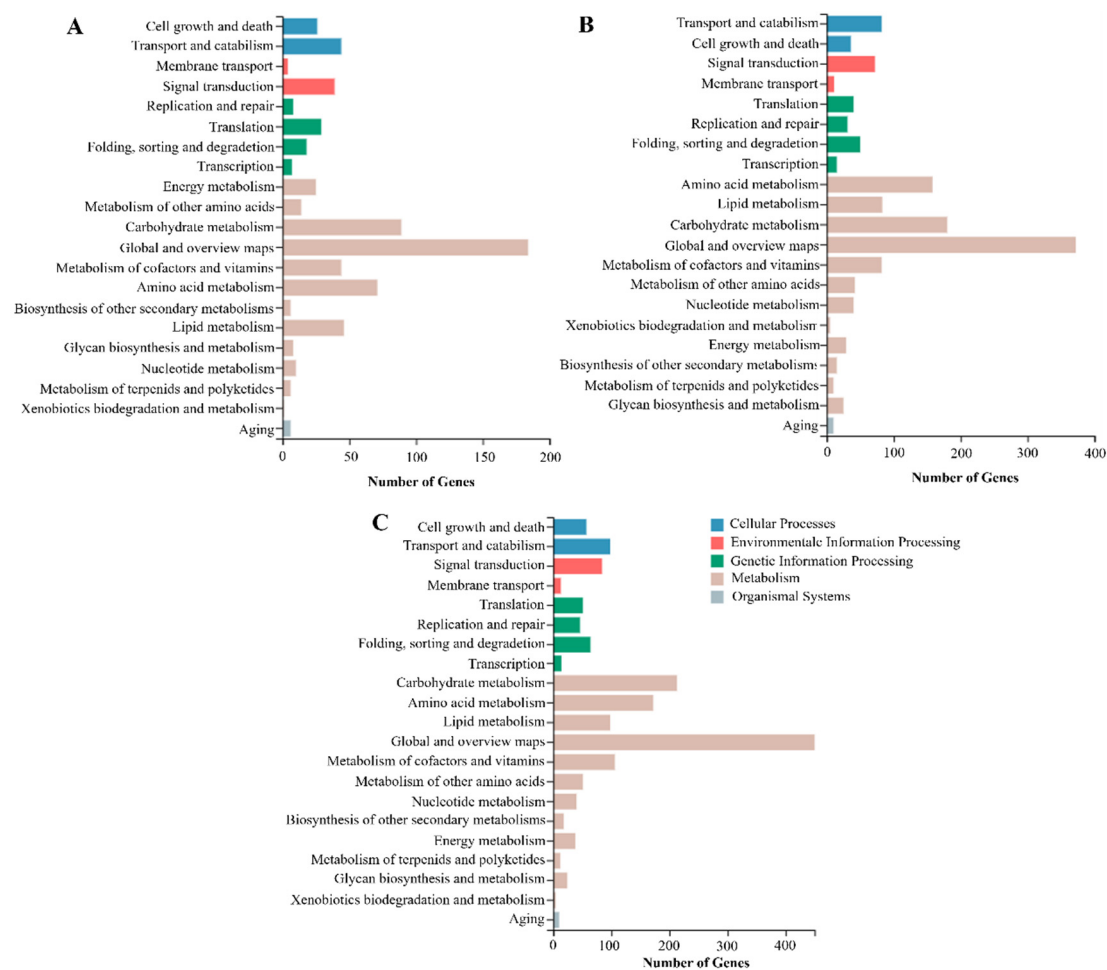

**Figure S4.** KEGG Pathway classification of DGES. A, B and C: KEGG Pathway classification of DEGs on the 3<sup>rd</sup> d (A), 5<sup>th</sup> d (B) and 7<sup>th</sup> d (C)
