# Supplementary material for: Effects of MrwetA on Sexual Reproduction and Secondary Metabolism of Monascus ruber M7 Based on Transcriptome Analysis
Source: J Fungi (Basel). 2024 May 8;10(5):338. doi: 10.3390/jof10050338 (PMC11122622; doi:10.3390/jof10050338)
Supplement: Supplementary file 1 [file jof-10-00338-s001.zip]

Archive with 7 entries (7 files):
- Figure S1. Schematic diagram of constructing transformation plasmid pCCMrwetA.pdf
- Figure S2. Verification of PCR products and vector on MrwetA complementation cassette.pdf
- Figure S3. PCR verification of MrwetA complementation strain.pdf
- Figure S4. KEGG Pathway classification of DGEs..pdf
- Table S1.xlsx
- Table S2.xlsx
- Table S3.xlsx
