# Supplementary material for: Effects of MrwetA on Sexual Reproduction and Secondary Metabolism of Monascus ruber M7 Based on Transcriptome Analysis
Source: J Fungi (Basel). 2024 May 8;10(5):338. doi: 10.3390/jof10050338 (PMC11122622; doi:10.3390/jof10050338)
Supplement: Supplementary file 1 [file jof-10-00338-s001.zip › Table S1.xlsx]

## Sheet: Sheet1
Table S1. Primers used in the construction of MrwetA complementation strain
Primers	Sequences (5'→3')	Function
MrwetA F1	CGGGCAGGACCGGACGGGGCGGTACGTCGACGCACAGTCAACCGATACAAGC	For amplification of the 2711 bp of 5' flanking regions and the whole MrwetA gene
MrwetA R1	CTAGAAGGCACTCTTTGCTGCTTGGTTAGCAGAGTGCGGCCT
TtrpC F	CCAAGCAGCAAAGAGTGCCTTCTAG	For amplification of the 597 bp of the TtrpC cassette from plasmid pSKH
TtrpC R	CCAACTCAACCCCATCGAACCCTAGAAAGAAGGATTACCTC
neo F	CCAACTCAACCCCATCGAACCGTAACC	For amplification of the 1221 bp of the neo cassette from plasmid PKNI
neo R	ATCATCATGCAACATGCATG
MrwetA F2	CATGCATGTTGCATGATGATACATGCCTGTCTGTGTTTTCC	For amplification of the 915 bp of 3' flanking regions of the MrwetA gene
MrwetA R2	CGTTGTAAAACGACGGCCAGTGCCAAGCTTTTTCTTCTGCTGTCTTGGCT
MrwetA-bF	GCGTCTTGGTCACTCGTTC	For amplification of the 1610 bp of partial fragments of MrwetA from ΔMrwetA::MrwetA and ΔMrwetA genome
MrwetA-bR	CGGCTTGTTTCACTGCTTTCA
hph F	GTCGACAGAAGATGATATTG	For amplification of the 2137 bp of the hph cassette from ΔMrwetA::MrwetA and ΔMrwetA genome
hph R	CTAGAAAGAAGGATTACCTC
