# Supplementary material for: Effects of MrwetA on Sexual Reproduction and Secondary Metabolism of Monascus ruber M7 Based on Transcriptome Analysis
Source: J Fungi (Basel). 2024 May 8;10(5):338. doi: 10.3390/jof10050338 (PMC11122622; doi:10.3390/jof10050338)
Supplement: Supplementary file 1 [file jof-10-00338-s001.zip › Table S2.xlsx]

## Sheet: Sheet1
Table S2. Primer combinations and expected sizes for validation of ΔMrwetA::MrwetA strains
Strains	Primer pairs
	MrwetA-bF/	MrwetA F1/	TtrpC F/	neo F/	hph F/
	MrwetA-bR	TtrpC R	MrwetA R2	neo R	hph R
ΔMrwetA::MrwetA	1610 bp	3339 bp	2763 bp	1221 bp	-
ΔMrwetA	-	-	-	-	2137 bp
