# Supplementary material for: Effects of MrwetA on Sexual Reproduction and Secondary Metabolism of Monascus ruber M7 Based on Transcriptome Analysis
Source: J Fungi (Basel). 2024 May 8;10(5):338. doi: 10.3390/jof10050338 (PMC11122622; doi:10.3390/jof10050338)
Supplement: Supplementary file 1 [file jof-10-00338-s001.zip › Table S3.xlsx]

## Sheet: Sheet1
Table S3. Homologues of Sexual Reproduction Related Genes of Aspergillus nidulans in Monascus ruber M7									*Query coverage ≧ 50%
Protein function	Sex effect	Locus ID	A. nidulans	Protein Accession	M. ruber M7	Query coverage	E-value	Per identify	Per identify≧35%
Perception of environmental signals									E-value≦0.05
Red light–sensing phytochrome	Repressor	AN9008	fphA	XP_682277.1	A1569	0.95	0	0.3957
Blue light–sensing white-collar	Activator	AN3435	lreA	XP_050468378.1	A4382	0.06	9e-10	0.4902
Blue light–sensing white-collar	Activator	AN3607	lreB	XP_661211.1	A7632	0.11	9e-10	0.451
Blue light- and UVA-sensing cryptochrome	Repressor	AN0387	cryA	CBF89585.1	——	——	——	——
Light/dark response	Activator	AN1052	veA	AAD42946.1	A3427	0.99	7e-134	0.4666
Light/dark response	Activator	AN0363	velB	XP_657967.2	A0750	0.96	2e-150	0.6576
Light/dark response	Activator	AN2059	velC	XP_659663.1	A0750	0.25	1e-10	0.3776
Light/dark response	Bimodal	AN0807	laeA	XP_658411.2	A6520	0.94	0	0.7062
Light response, low glucose sensing	Bimodal	AN6243	imeB	XP_663847.1	A4268	1	0	0.7281
Light response	Repressor	AN1893	silA	XP_050468761.1	A6166	0.99	0	0.5739
Light response	Repressor	AN0709	silG	AAT67992.1	A7561	0.99	0	0.4867
Amino acid sensing	Repressor	AN3675	cpcA	AAL09315.1	A2478	0.88	1e-61	0.5124
Amino acid sensing	Activator	AN4163	cpcB	AAF98065.1	A4545	1	0	0.9747
High salt sensing	Repressor	AN2330	lsdA	XP_659934.1	A5442	0.91	1e-92	0.4587
Low phosphorous sensing	Repressor	AN8261	phoA	XP_681530.1	A2927	0.84	0	0.8722
					A1844	0.77	4e-99	0.5
					A1690	0.77	9e-67	0.4041
					A2141	0.78	1e-66	0.3821
Low phosphorous sensing	Activator	AN5156	An-pho80	XP_050468153.1	A2088	0.81	7e-110	61.37%%
Early sexual development	Activator	AN9121	esdC	XP_682390.1	A3904	0.99	6e-89	0.5891
NO response (flavohaemoglobin)	Repressor	AN7169	fhbA (fhbB)	XP_661126.1	A7182	0.93	7e-126	0.4663
Mating processes and signal transduction
Mating type（aipha）	Activator	AN2755	MAT1	XP_660359.1	A5810	1	9e-93	0.439
Mating type	Activator	AN4734	MAT2	XP_050467652.1	A6749	1	2e-93	0.4583
a-Type pheromone receptor	Activator	AN7743	preA/gprB	XP_681012.1	A2622	0.99	9e-97	0.44735
Pheromone precursor (a-type)	Activator	AN5791	ppgA	XP_663395.1	——	——	——	——
a-type pheromone receptor	Activator	AN2520	preB/gprA	XP_660124.1	A6660	0.98	1e-81	0.4101
G protein a subunit	Activator	AN0651	fadA	XP_658255.1	A3495	1	0	0.9745
G protein b subunit	Activator	AN0081	sfaD	AAC33436.1	A1639	0.99	0	0.9459
G protein c subunit	Activator	AN2742	gpgA	XP_660346.1	A0341	1	3e-54	0.8837
Regulator of G protein signalling	Activator	AN5893	flbA	XP_663497.1	A0447	0.88	0	0.7347
Phosducin-like chaperone	Activator	AN0082	phnA	XP_657686.1	A1638	0.99	3e-91	0.5467
Ste20-like serine/threonine protein kinase	N/A	AN5674	STE20	XP_659671.1	A6140	0.99	0	0.6994
					A5061	0.66	1e-112	0.4655
MAP kinase, kinase, kinase	Activator	AN2269	steC/steB	XP_659873.1	A5109	0.99	0	0.7127
MAP kinase, kinase	Activator	AN3422	STE7	XP_661026.1	A5834	0.96	0	0.7252
MAP kinase	Activator	AN3719	mpkB	XP_661323.2	A0913	1	0	0.9605
Transcription factor	Activator	AN2290	steA	XP_659894.1	A5077	1	0	0.704
Kinase cascade regulator	Activator	AN7252	ste50	CBF78763.1	A5251	1	0	0.6574
Small G protein	Repressor	AN0182	rasA	XP_657786.1	A6297	1	1e-130	0.8826
GPCR (seven transmembrane)	Repressor	AN3387	gprD	XP_660991.1	A4172	0.93	8e-149	0.5106
					A1029	0.82	2e-91	0.4596
GPCR (seven transmembrane)	Activator	AN7795	gprK	XP_681064.1	——	——	——	——
G protein (b subunit-like)	Activator	N/A	gibB	——	——	——	——	——
GDP/GTP nucleotide exchange factor	Activator	N/A	ricA	XP_050468707.1	A7281	0.99	0	0.722
Osmotic and oxidative stress response (MAP kinase)	Repressor	AN1017	sakA/hogA	AAF97243.1	A3470	0.97	0	0.8448
Stress response (bZIP domain)	Repressor	AN2911	atfA	XP_050468508.1	A6818	0.86	0	0.7175
Transcription factors and other regulatory proteins
Transcription factor (bHLH, APSES)	Activator	AN5836	stuA	XP_050467081.1	A5923	0.98	0	0.632
Transcription factor	Activator	AN6230	medA	XP_663834.2	A4259	0.98	0	0.6009
Transcription factor (bHLH)	Activator	AN7553	devR	XP_680822.1	A5552	1	1e-139	0.6607
Transcription factor (leucine-zipper)	Activator	AN2094	dopA	XP_659698.1	A6109	0.99	0	0.6378
Transcription factor (zinc-finger)	Activator	AN4263	nsdC	XP_661867.1	A1670	1	0	0.6283
Transcription factor (zinc-finger)	Activator	AN3152	nsdD	XP_660756.1	A4382	1	3e-136	0.5416
Transcription factor (zinc-finger)	Activator	AN1848	nosA	XP_050468745.1	A4599	1	0	0.5904
Transcription factor (zinc-finger)	Repressor	AN5170	rosA	XP_662774.1	A4599	0.98	0	0.4353
Transcription factor (zinc-finger)	Repressor	AN2421	flbC	XP_660025.1	A4192	0.99	9e-150	0.6466
Transcription factor (putative)	Repressor	AN0721	flbE	XP_658325.1	A6651	0.74	2e-57	0.5584
Transcription factor (forkhead)	Activator	AN4521	fhpA	XP_662125.1	A3533	0.42	3e-68	0.5018
Transcription factor (zinc-finger)	Repressor	AN1652	nrdA/msnA	XP_659256.2	A7311	0.95	9e-137	0.4828
Developmental regulation (WD repeat)	Activator	AN6505	rcoA	XP_050467111.1	A1712	0.98	0	0.8705
COP9 signalosome subunit (PCI)	Activator	AN1491	csnA	AAT73769.1	A2291	0.96	0	0.686
COP10 signalosome subunit (PCI)	Activator	AN4783	csnB	XP_050467634.1	A5757	0.97	0	0.8444
COP9 signalosome subunit (PCI)	Bimodal	AN1539	csnD	XP_659143.1	A3772	0.98	0	0.7783
COP9 signalosome subunit (MPN+ with JAMM	Bimodal	AN2129	csnE	XP_659733.2	A1238	0.99	0	0.7832
COP9 signalosome subunit (PCI)	Activator	AN3623	csnG/acoB	XP_661227.1	A2495	0.99	2e-125	0.6084
Protein neddylation	Activator	AN2458	candA-C,	XP_660062.1	A5265	0.99	0	0.7061
Protein neddylation	Activator	AN10306	candA-N	C8VP82.1	A5265	0.88	5e-136	0.6977
Endogenous physiological processes
Oxylipin biosynthesis (dioxygenase)	Activator	AN1967	ppoA	XP_659571.1	A6105	0.08	4e-06	0.3646
Oxylipin biosynthesis	Activator	AN6320	ppoB	XP_663924.1	——	——	——	——
Oxylipin biosynthesis	Repressor	AN5028	ppoC	XP_662632.1	A6105	0.24	0.0003	0.244
Generation of reactive oxygen species (NADPH oxidase)	Activator	AN5457	noxA	XP_663061.1	A0858	0.99	0	0.7477
Intracellular siderophore synthesis (non-ribosomal peptide synthetase)	Activator	AN0607	sidC	XP_658211.1	A6679	0.98	0	0.5311
Regulation of cellular redox state (thioredoxin system)	Activator	AN0170	trxA	XP_657774.2	A6278	0.53	1e-67	0.6667
a-1,3 Glucanase/mutanase	Activator	AN7349	mutA	XP_680618.1	A2628	0.9	1e-74	0.3768
High-affinity hexose transporter	Activator	AN6923	hxtA	XP_664527.1	A1469	0.95	2e-155	0.4453
Fruitng body maturation
Protein ubiquitinylation (F-box)	Activator	AN10516	grrA	ABC25061.1	A4115	1	0	0.7184
Cell polarity, nuclear positioning (zinc-finger)	Activator	AN0078	samB	XP_657682.1	A1640	0.99	0	0.6775
Striatin scaffolding and Ca signalling	Activator	AN8071	strA	XP_681340.1	A2839	0.97	0	0.6782
Microtubule assembly (alpha-tubulin)	Activator	AN0316	tubB	P24634.2	A5580	1	0	0.8958
					A0774	0.99	0	0.6942
Trehalose production	Activator	AN1052	vosA	XP_659563.1	A2334	0.69	3e-122	0.6281
