# Supplementary figures and images for: Effects of MrwetA on Sexual Reproduction and Secondary Metabolism of Monascus ruber M7 Based on Transcriptome Analysis
Source: MDPI journal article supplement (doi:10.3390/jof10050338), 2024-05-08

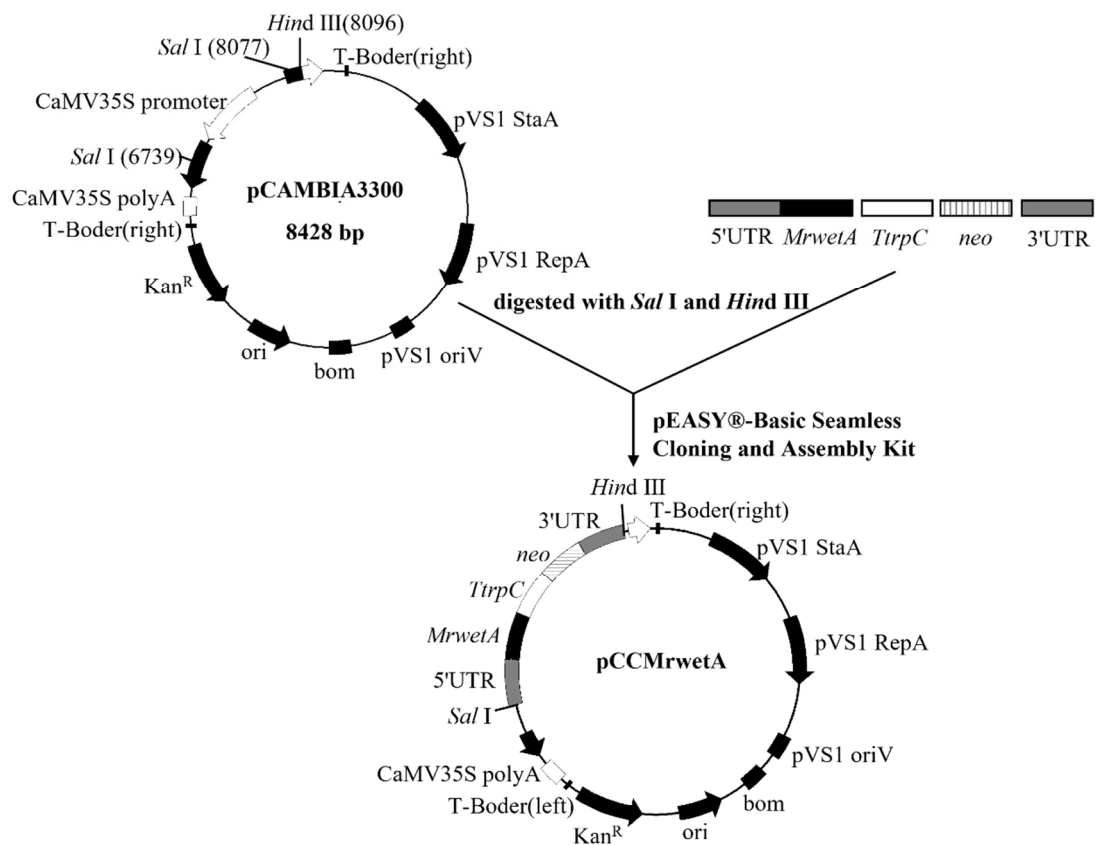

**Figure S1.** Schematic diagram of constructing transformation plasmid pCCMrwetA

Supplement: s1 [file s1]
